# Supplementary material for: GSK3 activity is a cell fate switch that balances the ratio of vascular cell type
Source: bioRxiv or medRxiv preprint supplement (doi:10.1101/2020.02.08.939595), 2020-02-10
Supplement: Supplementary file [file media-1.pdf]

**a**WT-VISUAL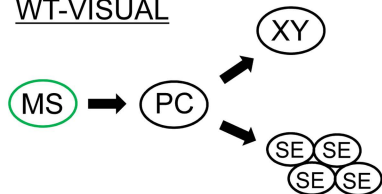*smxl4, 5*-VISUAL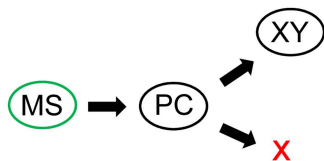

Wallner et al., 2017

**b**

VISUAL-CC (4dai)

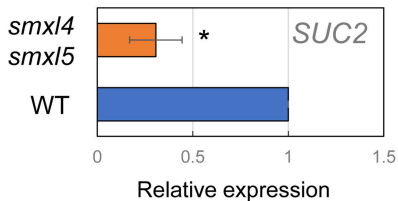VISUAL-CC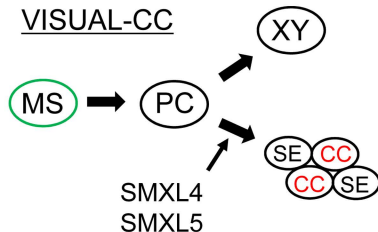

**Supplementary Fig. 1 | *smxl4 smxl5* mutants suppressed CC differentiation in VISUAL-CC**  
**a**, Schematic of the VISUAL differentiation process in the WT and *smxl4 smxl5*. The *smxl4 smxl5* double mutants were known to inhibit phloem differentiation in VISUAL. **b**, *SUC2* expression at 4d after VISUAL-CC induction in the WT and *smxl4 smxl5*. Asterisks indicate significant differences using the Student's t-test (\* $P < 0.05$ ,  $n = 3$ ).

## *pSUC2:ELUC*

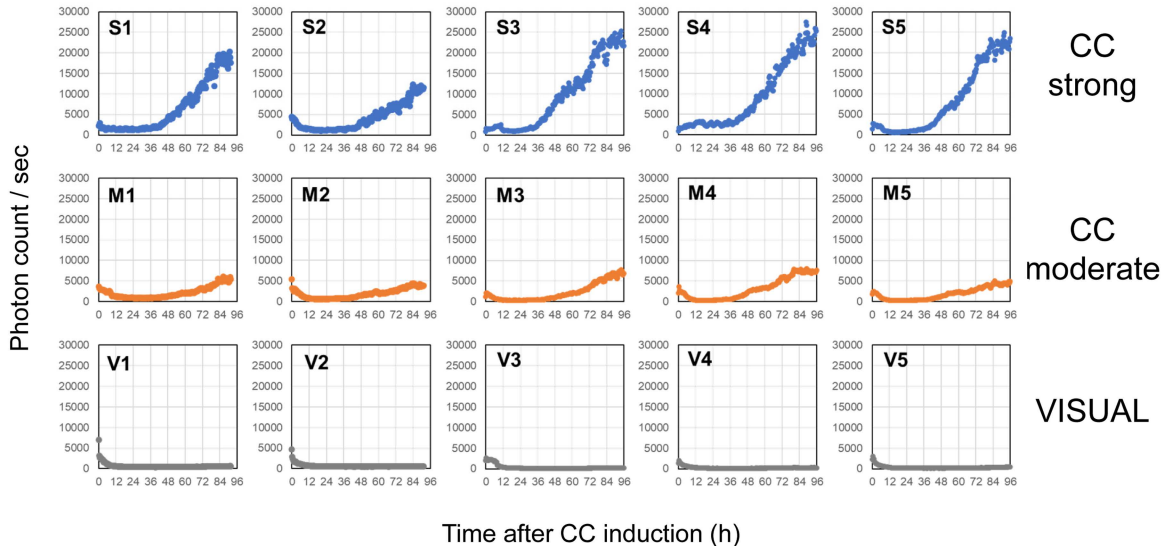

### Supplementary Fig. 2| Raw data from time-course analysis of *pSUC2:ELUC* plants

An example of *pSUC2:ELUC* signals from individual samples is shown. Vertical axis indicates photon counts per second detected by the luminometer. Samples were classified based on LUC intensity.

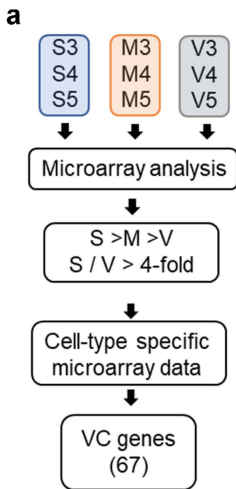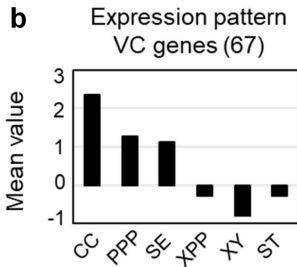

**c** Gene functional classification

| Gene functional clustering | Enrichment score |
|----------------------------|------------------|
| Peroxidase (4)             | 2.12             |
| <b>Transporter (10)</b>    | <b>0.82</b>      |
| Transcription factor(8)    | 0.57             |

### Supplementary Fig. 3| Characterization and molecular function of VC genes

**a**, Schematic of the selection process used to identify VISUAL-CC inducible genes. Expression levels of vascular-specific genes were determined using VISUAL-CC microarray data. **b**, Expression patterns of VC genes in the root stele obtained from a transcriptome dataset<sup>14</sup>. Mean values from Fig. 2A are shown. **c**, Functional classification of VC genes and VPP genes. Enrichment scores were calculated using David (<https://david.ncifcrf.gov/>). Transporter-related genes are over-represented in this category.

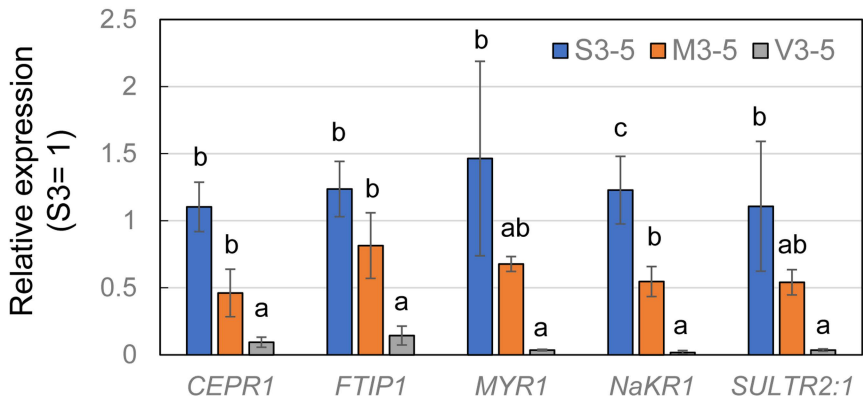

**Supplementary Fig. 4 | Statistical differences in expression levels of CC-related genes among the S, M, and V samples**

Expression levels of *CEPR*, *FTIP1*, *MYR1*, *NaKR1*, and *SULTR2:1* were quantified using qRT-PCR and compared statistically among the S3-5, M3-5, and V3-5 samples. Relative expression levels were calculated when the expression in S3 was set to 1. Statistical differences between samples are indicated by different letters (ANOVA, Tukey-Kramer method; n = 3; error bars indicate SD).

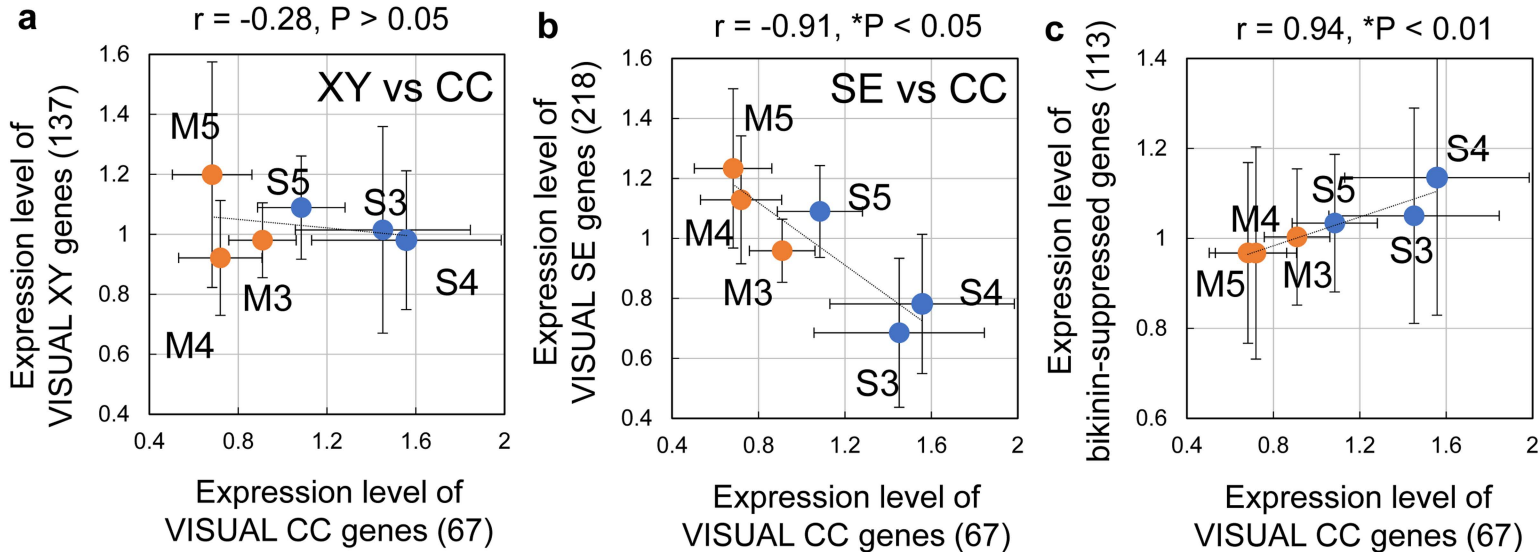

**Supplementary Fig. 5 | Correlation analysis in microarray data between the S and M samples**

**a**, VC genes (67) vs VX genes (137) **b**, VC genes (67) vs VS genes (218) **c**, VC genes (67) vs bikinin-suppressed genes (113). The Pearson correlation coefficient and  $P$ -value are marked above the chart. Error bars indicate SD.

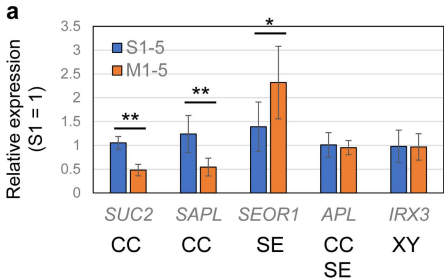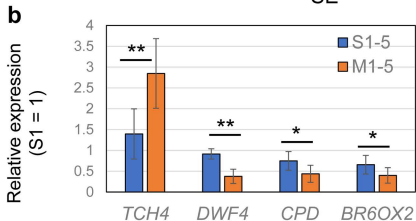

**Supplementary Fig. 6 | Statistical differences in expression levels between the S and M samples**

**a**, Expression levels of *SUC2* (as CC), *SAPL* (also as CC), *SEOR1* (as SE), *APL* (as CC+SE), and *IRX3* (XY) were quantified using qRT-PCR and compared statistically between the S and M samples. Asterisks indicate significant differences using the Student's t-test (\*\* $P < 0.005$ ; \* $P < 0.05$ ). **b**, Expression levels of GSK3 activity-dependent genes were quantified using qRT-PCR and compared statistically in the S and M samples. Asterisks indicate significant differences determined using the Student's t-test (\*\* $P < 0.005$ ; \* $P < 0.05$ ).

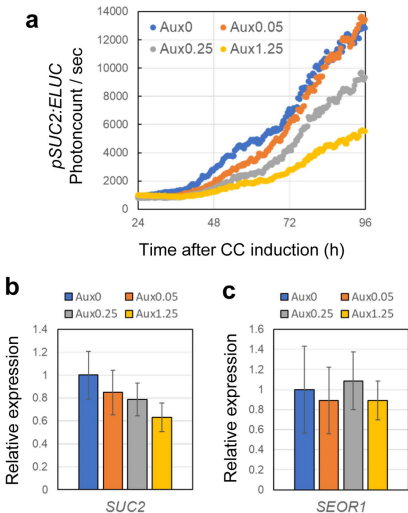

**Supplementary Fig. 7 | Auxin has only marginal effects on the formation of the SE-CC complex**

**a**, Time-course of  $pSUC2:ELUC$  signal intensities in VISUAL-CC cultures containing different concentrations of auxin (mg/L). **b** and **c**, Expression levels of *SUC2* (**b**) and *SEOR1* (**c**) in VISUAL-CC samples from cultures containing different concentrations of auxin. There are no significant differences (ANOVA, Tukey-Kramer method;  $n = 6$ ; error bars indicate SD).

## BR biosynthesis-related genes (negatively regulated by bikinin)

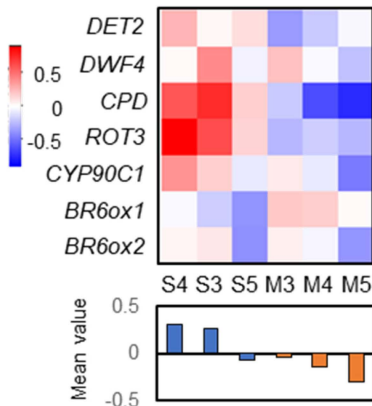

### Supplementary Fig. 8| Heat map of expression levels of BR biosynthesis-related genes in S and M samples.

The upper panel shows a heat map of expression levels of 6 BR biosynthesis-related genes, which are downregulated by bikinin, in S and M samples. The lower panel indicates the mean value for each sample.



**a**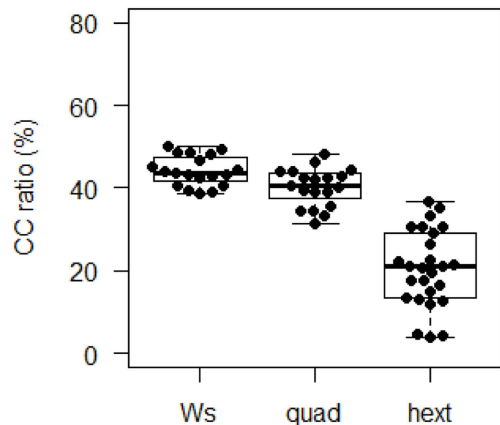**b**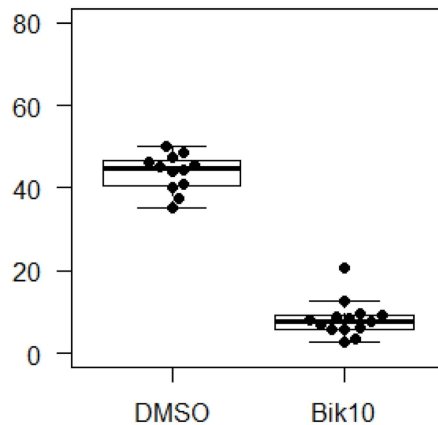**c**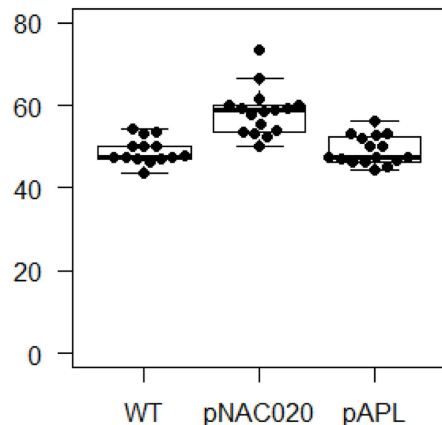

### Supplementary Fig. 9| Distribution of the SE/CC ratio among samples

Box plots of Fig. 4e and Fig. 5c were shown. Median values were indicated by central lines. First (Q1) and third (Q3) quartile were shown as a box. Lines show the range of  $Q1+1.5 \times$  interquartile and  $Q3-1.5 \times$  interquartile. Dots indicated distributions of each plot.

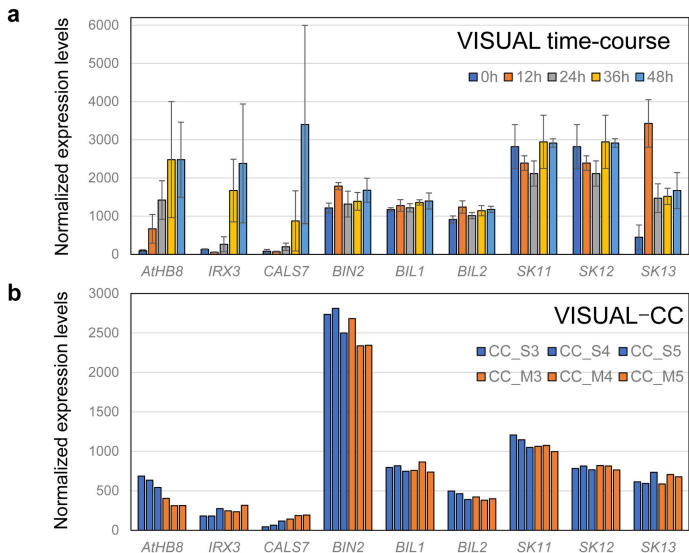

**Supplementary Fig. 10| Expression pattern of GSK3s in VISUAL and VISUAL-CC transcriptome data**

**a**, Normalized expression levels of procambium (*AtHB8*), xylem (*IRX3*), phloem SE (*CALS7*) and SKI/II GSK3 subgroup genes in VISUAL transcriptome data. Error bars indicate SD (n=3). **b**, Normalized expression levels of procambium (*AtHB8*), xylem (*IRX3*), phloem SE (*CALS7*) and SKI/II GSK3 subgroup genes in VISUAL-CC transcriptome data.

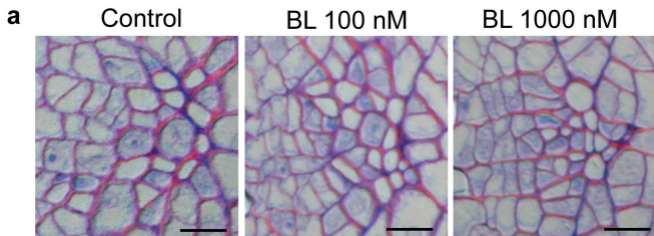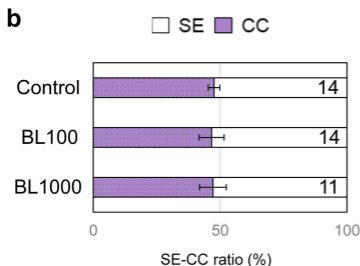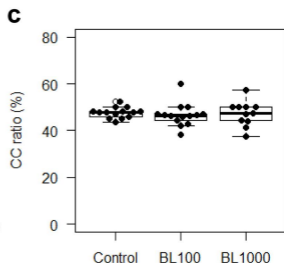

### Supplementary Fig. 11 | Effect of brassinolide treatment on phloem development

**a**, Toluidine blue-stained transverse sections of mock-treated (DMSO) and bikinin-treated hypocotyls. SE: white empty cell; CC: dense purple cell. **b**, SE/CC ratios (%) in the WT treated with none (control), 100 nM BL, and 1000 nM BL were calculated from toluidine blue-stained sections ( $n = 11-14$ ). Numbers of individuals are marked. **c**, Box plot of (b) was shown. Scale bars: 10  $\mu$ m.

WT

*bes1-D bzs1-D*

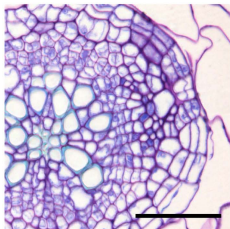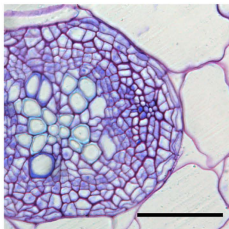

WT

*bes1-1 bzs1-2*

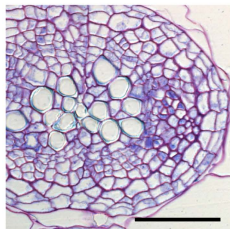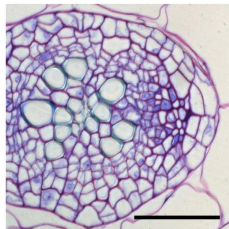

**Supplementary Fig. 12 | Transverse sections of *bes1 bzs1* mutants**

Toluidine blue-stained transverse sections for 11-day-old hypocotyls of WT, *bes1-D bzs1-D* (gain-of-function), and *bes1-1 bzs1-2* (loss-of-function) mutant plants. Scale bars: 50  $\mu$ m.

Supplementary Table 1. The list of VC genes (67).

| AGI code  | Description (based on TAIR)                                   |
|-----------|---------------------------------------------------------------|
| At1g01470 | Late embryogenesis abundant protein (LEA14)                   |
| At1g10380 | Putative membrane lipoprotein                                 |
| At1g12090 | extensin-like protein (ELP)                                   |
| At1g13380 | Protein of unknown function (DUF1218) (DUF1218)               |
| At1g13590 | phytosulfokine 1 precursor (PSK1)                             |
| At1g22710 | sucrose-proton symporter 2 (SUC2)                             |
| At1g49310 | transmembrane protein                                         |
| At1g49500 | transcription initiation factor TFIID subunit 1b-like protein |
| At1g59740 | NRT1/ PTR FAMILY 4.3                                          |
| At1g59960 | NAD(P)-linked oxidoreductase superfamily protein              |
| At1g68740 | PHO1;H1                                                       |
| At1g76130 | alpha-amylase-like 2 (AMY2)                                   |
| At1g77380 | amino acid permease 3 (AAP3)                                  |
| At2g02020 | NRT1/ PTR FAMILY 8.4                                          |
| At2g02130 | low-molecular-weight cysteine-rich 68 (LCR68)                 |
| At2g04160 | Subtilisin-like serine endopeptidase family protein (AIR3)    |
| At2g19590 | ACC oxidase 1 (ACO1)                                          |
| At2g22860 | phytosulfokine 2 precursor (PSK2)                             |
| At2g30070 | potassium transporter 1 (KT1)                                 |
| At2g37130 | Peroxidase superfamily protein                                |
| At2g44380 | Cysteine/Histidine-rich C1 domain family protein              |
| At2g46690 | SMALL AUXIN UPREGULATED RNA 32 (SAUR32)                       |
| At3g09260 | BGLU23                                                        |
| At3g12730 | SAPL                                                          |
| At3g12750 | zinc transporter 1 precursor (ZIP1)                           |
| At3g14560 | hypothetical protein                                          |
| At3g14840 | LYSM RLK1-INTERACTING KINASE 1 (LIK1)                         |
| At3g15950 | DNA topoisomerase-related                                     |
| At3g16450 | JACALIN-RELATED LECTIN 33 (JAL33)                             |
| At3g16460 | JACALIN-RELATED LECTIN 34 (JAL34)                             |
| At3g20370 | TRAF-like family protein                                      |
| At3g21770 | Peroxidase superfamily protein                                |
| At3g23050 | indole-3-acetic acid 7 (IAA7)                                 |
| At3g60720 | plasmodesmata-located protein 8 (PDLP8)                       |
| At3g63110 | isopentenyltransferase 3 (IPT3)                               |
| At4g12470 | azelaic acid induced 1 (AZI1)                                 |
| At4g12550 | Auxin-Induced in Root cultures 1 (AIR1)                       |
| At4g14465 | AT-hook motif nuclear-localized protein 20 (AHL20)            |
| At4g15660 | GRXS8                                                         |

At4g15690 GRXS5  
At4g19840 phloem protein 2-A1 (PP2-A1)  
At4g21960 Peroxidase superfamily protein  
At4g27410 NAC (No Apical Meristem) domain transcriptional regulator superfamily protein (RD26)  
At4g32290 Core-2/l-branching beta-1,6-N-acetylglucosaminyltransferase family protein  
At4g32870 Polyketide cyclase/dehydrase and lipid transport superfamily protein  
At4g35480 RING-H2 finger A3B (RHA3B)  
At4g36410 ubiquitin-conjugating enzyme 17 (UBC17)  
At4g37540 LOB domain-containing protein 39 (LBD39)  
At5g01210 HXXXD-type acyl-transferase family protein  
At5g01840 ovate family protein 1 (OFP1)  
At5g02260 expansin A9 (EXPA9)  
At5g02600 NaKR1  
At5g07010 sulfotransferase 2A (ST2A)  
At5g18240 myb-related protein 1 (MYR1)  
At5g23820 MD2-RELATED LIPID RECOGNITION 3 (ML3)  
At5g24800 BASIC LEUCINE ZIPPER 9 (BZIP9)  
At5g26260 TRAF-like family protein  
At5g26280 TRAF-like family protein  
At5g28770 BASIC LEUCINE ZIPPER 63 (BZIP63)  
At5g43380 type one serine/threonine protein phosphatase 6 (TOPP6)  
At5g43580 UNUSUAL SERINE PROTEASE INHIBITOR (UPI)  
At5g49660 CEPR1 / XIP1  
At5g54130 Calcium-binding endonuclease/exonuclease/phosphatase family  
At5g59080 hypothetical protein  
At5g63710 Leucine-rich repeat protein kinase family protein  
At5g64120 Peroxidase superfamily protein  
At5g65970 Seven transmembrane MLO family protein (MLO10)

---

## Supplementary Table 2

Primers used in this study for qRT-PCR

| name       | sequence (5'-3')           |
|------------|----------------------------|
| CPD-L      | AACCCTTGGAGATGGCAGA        |
| CPD-R      | GTAACCGGGACATAGCCTTG       |
| DWF4-L     | TTCTCGTTATGACCAACCTAATCTC  |
| DWF4-R     | AGGATGACGCTCCGTTGTT        |
| UBQ14-L    | TCCGGATCAGCAGAGGTT         |
| UBQ14-R    | TCTGGATGTTGTAGTCAGCAAGA    |
| APL-L      | TGGATATTCAGCGCAACGTA       |
| APL-R      | TGCACTTCCATTTGCATCTC       |
| SUC2-L     | TAGCCATTGTCGTCCCTCA        |
| SUC2-R     | CCACCACCGAATAGTTCGTC       |
| IRX3-L     | TGACATGAATGGTGACGTAGC      |
| IRX3-R     | CATCAAATGCTCCTTATCACCTT    |
| SEOR1-L    | AAGACACCAACGCCTCCA         |
| SEOR1-R    | CGATAGCATAGGAGACACTATCAAGA |
| CALS7-L    | GCAGTAATGGA ACTCCCTGAGA    |
| CALS7-R    | GGCTGAATGGAATCTTGGTC       |
| SAPL-L     | AGAGCCATCTCCAGAAGTTCA      |
| SAPL-R     | CCTTCGAAGATCCAACATGG       |
| TCH4-L     | GCTCAACAAAGGATGAGATGG      |
| TCH4-R     | CCTCTTCGCATCCGTACAAT       |
| BR6ox2-L   | CCCATGGAGATGGATGGA         |
| BR6ox2-R   | CTTTCCAGGGCAAAGCCTA        |
| SULTR2:1-L | AACGATCTCATGGCTGGTTTA      |
| SULTR2:1-R | TTGCATAACCAATGCTCTGC       |
| NaKR1-L    | GCTCAGTTTTGGCCTGAGATT      |
| NaKR1-R    | GTGGTGAATCAGCCAGTCCT       |
| CEPR1-L    | TATGGCTGGCACCTATGGTT       |
| CEPR1R     | GATCGTTGCTTTGGACGAGT       |
| FTIP1-L    | GCGCAAGATGTTGAGCCTA        |
| FTIP1-R    | TTGTACTTTAACGAAAGCTTGAGG   |
| MYR1-L     | GAAGTAGACGAAAGTCACAGTGAGAG |
| MYR1-R     | GGCATCACTTATGGGTAAGTTCA    |

## Supplementary Method

### **VISUAL-CC**

VISUAL-CC consists of two distinct steps; vascular stem cell formation and subsequent phloem differentiation. As the initial step, 6 or 7 day-old seedlings were cultured with the conventional VISUAL medium for 2 days in order to induce sufficient amount of (pro)cambial cells. After that samples are transferred into VISUAL-CC medium for SE-CC complex differentiation.

### **Materials**

#### **Growth of plant samples before VISUAL induction**

1. MS growth medium: It contains 2.2 g/L MS Basal Medium (Sigma), 10 g/L sucrose and 0.5 g/L 2-morpholinoethanesulfonic acid monohydrate (MES) in Milli-Q water and the pH is adjusted to 5.7 with KOH. The solution is autoclaved at 120°C for 20 min and can be stored at room temperature up to several weeks.
2. Sterilizing solution: Sodium hypochlorite solution is diluted in Milli-Q water in the ratio 1:9 (v/v) and 0.1% of Triton-X100 is added. This solution is prepared immediately before the sterilizing procedure.
3. Sterilized 6-well plate (Sumilon)
4. Autoclaved Milli-Q water
5. Surgical tape
6. Continuous light chamber (22°C, 45–55  $\mu\text{mol}/\text{m}^2/\text{s}$ )
7. Rotary shaker (Taitec)

#### **VISUAL and VISUAL-CC**

1. VISUAL base medium: It contains 2.2 g/L MS Basal Medium and 50 g/L D(+)-Glucose in Milli-Q water and the pH is adjusted to 5.7 with KOH. The solution is autoclaved at 120°C for 20 min and can be stored at room temperature for several weeks.
2. VISUAL-CC base medium: It contains 2.2 g/L MS Basal Medium and 10 g/L D(+)-Glucose in Milli-Q water and the pH is adjusted to 5.7 with KOH. The solution is autoclaved at 120°C for 20 min and can be stored at room temperature for several



weeks. Note that Glucose concentration is different from that of VISUAL base medium.

3. 2,4-D stock: 2.5 g/L 2,4-D stock dissolved in autoclaved Milli-Q water and sterilized through 0.22  $\mu\text{m}$  filter units. Stored in small amounts in sampling tubes at  $-20^{\circ}\text{C}$ .
4. Kinetin stock: 0.5 g/L Kinetin stock dissolved in 0.1 M KOH and sterilized through 0.22  $\mu\text{m}$  filter units. Stored in small amounts in sampling tubes at  $-20^{\circ}\text{C}$ .
5. Bkinin stock: 10 mM Bkinin stock dissolved in DMSO and sterilized through 0.22  $\mu\text{m}$  filter units. Stored in small amounts in sampling tubes at  $-20^{\circ}\text{C}$ .
6. Sterilized 12-well plate (Sumilon)
7. Surgical forceps
8. Continuous light chamber ( $22^{\circ}\text{C}$ ,  $60\text{--}70 \mu\text{mol}/\text{m}^2/\text{s}$ )
9. Rotary shaker (Taitec)

## **Methods**

### **Growth of plant samples before VISUAL induction**

1. Sterilizing solution is added to the Arabidopsis seeds in 1.5 mL sampling tubes and gently mixed using a rotator for 5 min. The tubes are transferred inside a clean bench and allowed to stand for further 5 min. The sterilizing solution is then removed using a pipette and the seeds are washed with autoclaved Milli-Q water three times. The seeds are soaked in water at  $4^{\circ}\text{C}$  for 2 days to keep the germination timing constant.
2. 10 mL of the prepared MS growth medium is poured into each well of a 6-well plate. Seeds are sown at a density of 8-10 seeds/well containing the MS growth medium and the plate is sealed with surgical tape. The well plate is incubated for 6-7 days under continuous light ( $22^{\circ}\text{C}$ ,  $45\text{--}55 \mu\text{mol}/\text{m}^2/\text{s}$ ) with shaking at 110 rpm on a rotary shaker.

### **VISUAL**

1. 2,4-D stock, kinetin stock and bkinin stock are defrosted at room temperature before use. The tubes are transferred inside a clean bench and added to the VISUAL base medium to obtain a final concentration of 1.25 mg/L 2,4-D, 0.25 mg/L kinetin and 10  $\mu\text{M}$  bkinin. About 2.5 mL of the above medium is then added into each well of a

12-well plate.

2. A pair of sharp surgical forceps are used to cut the bottom half of Arabidopsis 6-7 day-old plants across the center of the hypocotyl and the roots are removed. About 4 of the Arabidopsis explants are then transferred carefully to each well containing the induction medium using forceps and the 12-well plate sealed with surgical tape. The explants are cultured for 2 days under continuous light (22°C, 60–70  $\mu\text{mol}/\text{m}^2/\text{s}$ ) with shaking at 110 rpm on a rotary shaker.

### **VISUAL-CC**

1. 2,4-D stock, kinetin stock and bikinin stock are defrosted at room temperature before use. The tubes are transferred inside a clean bench and added to the VISUAL-CC base medium to obtain a final concentration of 0.25 mg/L 2,4-D, 0.25 mg/L kinetin and 1  $\mu\text{M}$  bikinin. About 2.5 mL of the above medium is then added into each well of a 12-well plate. Note that auxin and bikinin concentration is decreased when compared to the VISUAL.
2. VISUAL-induced samples were transferred into the new CC medium and then cultured for 4 days under dark condition (22°C) with shaking at 110 rpm on a rotary shaker. Note that light severely affect CC differentiation ratio.
